# Supplementary material for: Therapeutic and space radiation exposure of mouse brain causes impaired DNA repair response and premature senescence by chronic oxidant production
Source: publisher site journal article supplement (doi:10.18632/aging.100587), 2013-08-06
Supplement: Supplementary file [file aging-v5i8-100587-supplementary-material-SD1.pdf]

## SUPPLEMENTARY FIGURE

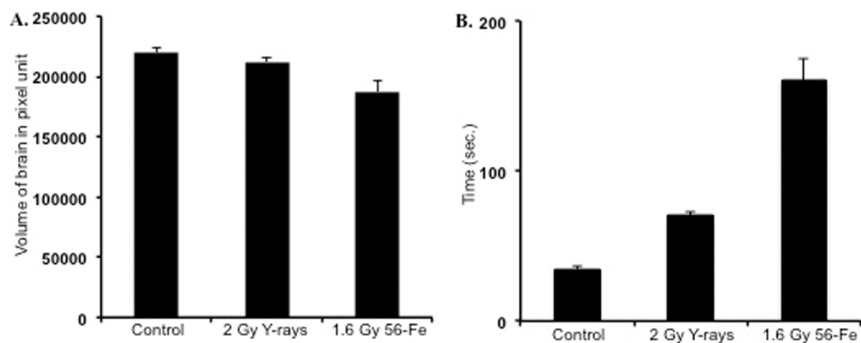

**Supplementary Figure 1.** Radiation exposure caused decreased brain volume and increased time to cross a barrier. A) Volumetric measurement of brain performed using magnetic resonance imaging (MRI) showed decrease brain volume after radiation exposure. Brain volume was decreased more after <sup>56</sup>Fe radiation. B) Activity experiment performed using a physical barrier showed increased time required by the irradiated mice to climb the barrier. <sup>56</sup>Fe irradiated mice needed more time to come out of the barrier. Data presented as mean  $\pm$  SEM.
